# Supplementary material
Source: PubMed Central journal article supplement (PMC9725075)
Supplement: EIJ-D-19-00943_Maarse_SD.pdf [file EIJ-D-19-00943_Maarse_SD.pdf]

## Supplementary data

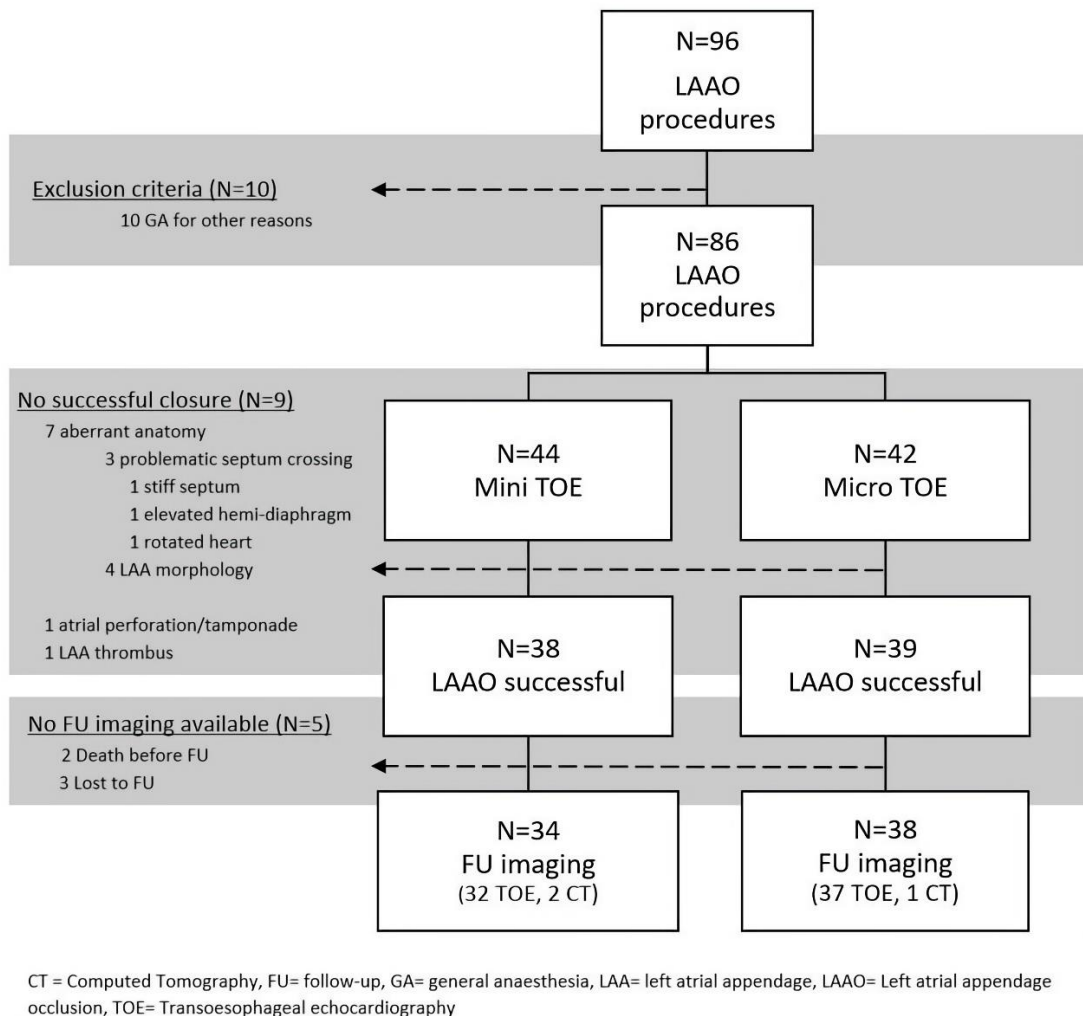

**Supplementary Figure 1.** Flow chart of patient inclusion.

**Supplementary Table 1. Baseline characteristics.**

|                                              | Micro TOE<br>group<br>(n=42) | Mini TOE<br>group<br>(n=44) | Total<br>(n=86) | p-value |
|----------------------------------------------|------------------------------|-----------------------------|-----------------|---------|
| Age, years                                   | 72.6±7.1                     | 72.7±6.3                    | 72.6±6.7        | 0.938   |
| Male gender (%)                              | 27 (64%)                     | 29 (66%)                    | 56 (65%)        | 0.875   |
| <b>Indication for LAAO* (%)</b>              |                              |                             |                 |         |
| History of bleeding                          | 34 (81%)                     | 32 (73%)                    | 66 (77%)        | 0.367   |
| High risk of bleeding                        | 2 (5%)                       | 1 (2%)                      | 3 (4%)          | 0.529   |
| Thromboembolic event under (N)OAC            | 6 (14%)                      | 6 (14%)                     | 12 (14%)        | 0.843   |
| Personal preference                          | 2 (5%)                       | 3 (7%)                      | 5 (6%)          | 1.000   |
| Other                                        | 4 (10%)                      | 6 (14%)                     | 10 (12%)        | 0.739   |
| <b>Atrial fibrillation type</b>              |                              |                             |                 |         |
| Paroxysmal                                   | 24 (57%)                     | 19 (43%)                    | 43 (50%)        | 0.018   |
| Persistent                                   | 1 (2%)                       | 10 (23%)                    | 11 (13%)        |         |
| Permanent                                    | 17 (41%)                     | 15 (34%)                    | 32 (37%)        |         |
| <b>CHA<sub>2</sub>DS<sub>2</sub>-VASc</b>    |                              |                             |                 |         |
| ≤1                                           | 3 (7%)                       | 0 (0%)                      | 3 (4%)          | 0.137   |
| 2-3                                          | 6 (14%)                      | 10 (23%)                    | 16 (19%)        |         |
| ≥4                                           | 33 (79%)                     | 34 (77%)                    | 67 (78%)        |         |
| <b>HAS-BLED</b>                              |                              |                             |                 |         |
| <3                                           | 13 (31%)                     | 16 (36%)                    | 29 (34%)        | 0.652   |
| ≥3                                           | 29 (69%)                     | 28 (64%)                    | 57 (66%)        |         |
| <b>Anticoagulation at hospital admission</b> |                              |                             |                 |         |
| None                                         | 13 (31%)                     | 11 (25%)                    | 24 (28%)        | 0.538   |
| APT                                          | 15 (36%)                     | 12 (27%)                    | 27 (31%)        | 0.399   |
| (N)OAC                                       | 11 (26%)                     | 18 (41%)                    | 29 (34%)        | 0.149   |
| (N)OAC+APT                                   | 3 (7%)                       | 3 (7%)                      | 6 (7%)          | 1.000   |
| <b>Anticoagulation at discharge</b>          |                              |                             |                 |         |
| None                                         | 0 (0%)                       | 1 (2%)                      | 1 (1%)          | 1.000   |
| APT                                          | 5 (12%)                      | 13 (30%)                    | 18 (21%)        | 0.044   |
| DAPT                                         | 12 (29%)                     | 9 (21%)                     | 21 (25%)        | 0.381   |
| (N)OAC                                       | 11 (26%)                     | 15 (35%)                    | 26 (31%)        | 0.425   |
| (N)OAC+APT                                   | 3 (7%)                       | 5 (12%)                     | 8 (9%)          | 0.714   |
| LMWH+APT                                     | 11 (26%)                     | 0 (0%)                      | 11 (13%)        | <0.000  |

Values are mean±standard deviation, median [interquartile range] or n (%).

\*Some patients had multiple indications.

APT: antiplatelet therapy; DAPT: dual antiplatelet therapy; LAAO: left atrial appendage occlusion; LMWH: low molecular weight heparin; (N)OAC: (novel) oral anticoagulation therapy; TOE: transoesophageal echocardiography

**Supplementary Table 2. Procedural characteristics.**

|                                          | Micro<br>TOE group<br>(n=42) | Mini<br>TOE group<br>(n=44) | Total<br>(n=86) | <i>p</i> -value |
|------------------------------------------|------------------------------|-----------------------------|-----------------|-----------------|
| <b>Type of procedure</b>                 |                              |                             |                 |                 |
| <b>LAAO combined with PVI</b>            | 16 (39%)                     | 12 (27%)                    | 28 (33%)        | 0.359           |
| <b>LAAO</b>                              | 26 (62%)                     | 32 (73%)                    | 58 (67%)        |                 |
| <b>Type of device</b>                    |                              |                             |                 |                 |
| <b>WATCHMAN</b>                          | 37 (88%)                     | 40 (91%)                    | 77 (90%)        | 0.736           |
| <b>AMPLATZER Amulet</b>                  | 5 (12%)                      | 4 (9%)                      | 9 (11%)         |                 |
| <b>General anaesthesia</b>               | 6 (14%)                      | 0 (0%)                      | 6 (8%)          | 0.011           |
| <b>Rhythm at start of device implant</b> |                              |                             |                 |                 |
| <b>Sinus rhythm</b>                      | 24 (57%)                     | 24 (55%)                    | 48 (56%)        | 0.808           |
| <b>Atrial fibrillation</b>               | 18 (43%)                     | 20 (46%)                    | 38 (44%)        |                 |
| <b>Duration of implantation (min)</b>    | 46±19                        | 49±20                       | 48±20           | 0.478           |
| <b>Fluoroscopy time (min)</b>            | 9±3                          | 9±4                         | 9±4             | 0.816           |
| <b>DAP (Gycm<sup>2</sup>)</b>            | 19 [10.25-32.25]             | 20.25 [12.50-33.0]          | 20 [11.0-33.0]  | 0.387           |
| <b>Mean device size (mm)</b>             | 25±3                         | 25±4                        | 25±3            | 0.656           |
| <b>No. of devices used</b>               | 1 [1-1]                      | 1 [1-1]                     | 1 [1-1]         | 0.961           |
| <b>No. of partial recaptures</b>         | 0 [0-1]                      | 0 [0-1]                     | 0 [0-1]         | 0.915           |
| <b>No. of full recaptures</b>            | 0 [0-2]                      | 0 [0-1.25]                  | 0 [0-2]         | 0.507           |
| <b>LAAO completed</b>                    | 39 (93%)                     | 38 (86%)                    | 77 (90%)        | 0.485           |

Values are mean±standard deviation, median [interquartile range] or n (%).

\*Time between venous puncture and sheath removal.

DAP: dose area product; LAAO: left atrial appendage occlusion; PVI: pulmonary vein isolation; TOE: transoesophageal echocardiography

**Supplementary Table 3. Echocardiographic findings.**

|                                |                                                         | <b>Micro<br/>TOE group<br/>(n=42)</b> | <b>Mini<br/>TOE group<br/>(n=44)</b> | <b>Total<br/>(n=86)</b> | <b>p-value</b> |
|--------------------------------|---------------------------------------------------------|---------------------------------------|--------------------------------------|-------------------------|----------------|
| <b>Baseline</b>                | <b>Successful insertion</b>                             | 42 (100%)                             | 44 (100%)                            | 86 (100%)               | -              |
|                                | <b>Interrupted procedures</b>                           | 0 (0%)                                | 0 (0%)                               | 0 (0%)                  | -              |
|                                | <b>Minor probe-related complications</b>                | 0 (0%)                                | 2 (5%)                               | 2 (2%)                  | 0.494          |
|                                | <b>Diameter ostium LAA, mm</b>                          |                                       |                                      |                         |                |
|                                | 0                                                       | 20±4                                  | 21±4                                 | 21±4                    | 0.532          |
|                                | 45                                                      | 19±3                                  | 19±3                                 | 19±3                    | 0.974          |
|                                | 90                                                      | 20±3                                  | 20±4                                 | 20±3                    | 0.964          |
|                                | 135                                                     | 20±5                                  | 21±5                                 | 20±5                    | 0.478          |
|                                | <b>Length LAA, mm</b>                                   |                                       |                                      |                         |                |
|                                | 0                                                       | 27±7                                  | 26±7                                 | 26±7                    | 0.795          |
|                                | 45                                                      | 27±6                                  | 25±7                                 | 26±6                    | 0.156          |
|                                | 90                                                      | 25±6                                  | 25±7                                 | 25±6                    | 0.937          |
|                                | 135                                                     | 23±5                                  | 23±7                                 | 23±6                    | 0.965          |
|                                | <b>Compression, percentages *</b>                       |                                       |                                      |                         |                |
|                                | Min.                                                    | 12±6                                  | 12±7                                 | 12±6                    | 0.975          |
|                                | Max.                                                    | 20±6                                  | 21±6                                 | 20±6                    | 0.915          |
|                                | <b>Peri-device leakage, mm †</b>                        |                                       |                                      |                         |                |
| No leakage                     | 33 (83%)                                                | 27 (73%)                              | 60 (78%)                             | 0.314                   |                |
| Minimal residual flow ‡        | 7 (17%)                                                 | 10 (27%)                              | 17 (22%)                             |                         |                |
| Significant residual flow §    | 0 (0%)                                                  | 0 (0%)                                | 0 (0%)                               |                         |                |
| <b>Thrombus</b>                | 0 (0%)                                                  | 2 (5%)                                | 2 (2%)                               | 0.494                   |                |
| <b>Follow-up</b>               | <b>Imaging modality</b>                                 |                                       |                                      |                         |                |
|                                | TOE (X7-2t)                                             | 37 (97%)                              | 32 (94%)                             | 69 (96%)                | 0.594          |
|                                | CT *                                                    | 1 (3%)                                | 2 (6%)                               | 3 (4%)                  |                |
|                                | <b>Duration between FU imaging and LAAO<br/>in days</b> | 76±19                                 | 90±32                                | 83±27                   | 0.025          |
|                                | <b>Peri-device leakage</b>                              |                                       |                                      |                         |                |
|                                | No leakage                                              | 32 (87%)                              | 19 (56%)                             | 51 (72%)                | 0.013          |
|                                | Minimal residual flow ‡                                 | 4 (11%)                               | 14 (41%)                             | 18 (25%)                |                |
|                                | Significant residual flow §                             | 1 (3%)                                | 1 (3%)                               | 2 (3%) <sup>§</sup>     |                |
|                                | <b>Mean difference leakage in mm</b>                    | 0.22±0.22                             | 0.53±0.28                            | 0.37±0.15               | 0.377          |
|                                | <b>Device embolisation</b>                              | 1 (3%)                                | 0 (0%)                               | 1 (2%) <sup>§</sup>     | 1.000          |
| <b>Device-related thrombus</b> | 1 (3%)                                                  | 0 (0%)                                | 1 (2%) <sup>§</sup>                  | 1.000                   |                |

Values are mean±standard deviation, median [interquartile range] or n (%).

\*Measured in successful LAAO by WATCHMAN device at 0, 45, 90 and 135 degrees.

† Only measured in successful LAAO. ‡ WATCHMAN ≤5 mm, AMPLATZER Amulet ≤3 mm.

§ WATCHMAN >5 mm, AMPLATZER Amulet >3 mm.

\*CT imaging was performed on the Philips 256-slice Brilliance iCT scanner (Philips Medical Systems, Best, the Netherlands) with a vena pulmonalis step and shoot protocol.

§Observed with standard TOE probe.

CT: computed tomography; FU: follow-up; LAA: left atrial appendage; LAAO: left atrial appendage occlusion; TOE: transoesophageal echocardiography
